# Supplementary material
Source: PubMed Central journal article supplement (PMC3309180)
Supplement: mmc1.pdf [file mmc1.pdf]

American Journal of Human Genetics, Volume 90

## **Supplemental Information**

### **Genome-wide Association Study of Three-Dimensional**

### **Facial Morphology Identifies a Variant**

### **in *PAX3* Associated with Nasion Position**

Lavinia Paternoster, Alexei I. Zhurov, Arshed M. Toma, John P. Kemp, Beate St. Pourcain, Nicholas J. Timpson, George McMahon, Wendy McArdle, Susan M. Ring, George Davey Smith, Stephen Richmond, and David M. Evans

Figure S1. Distributional plots for the 54 distances and 14 principal components in the discovery sample.

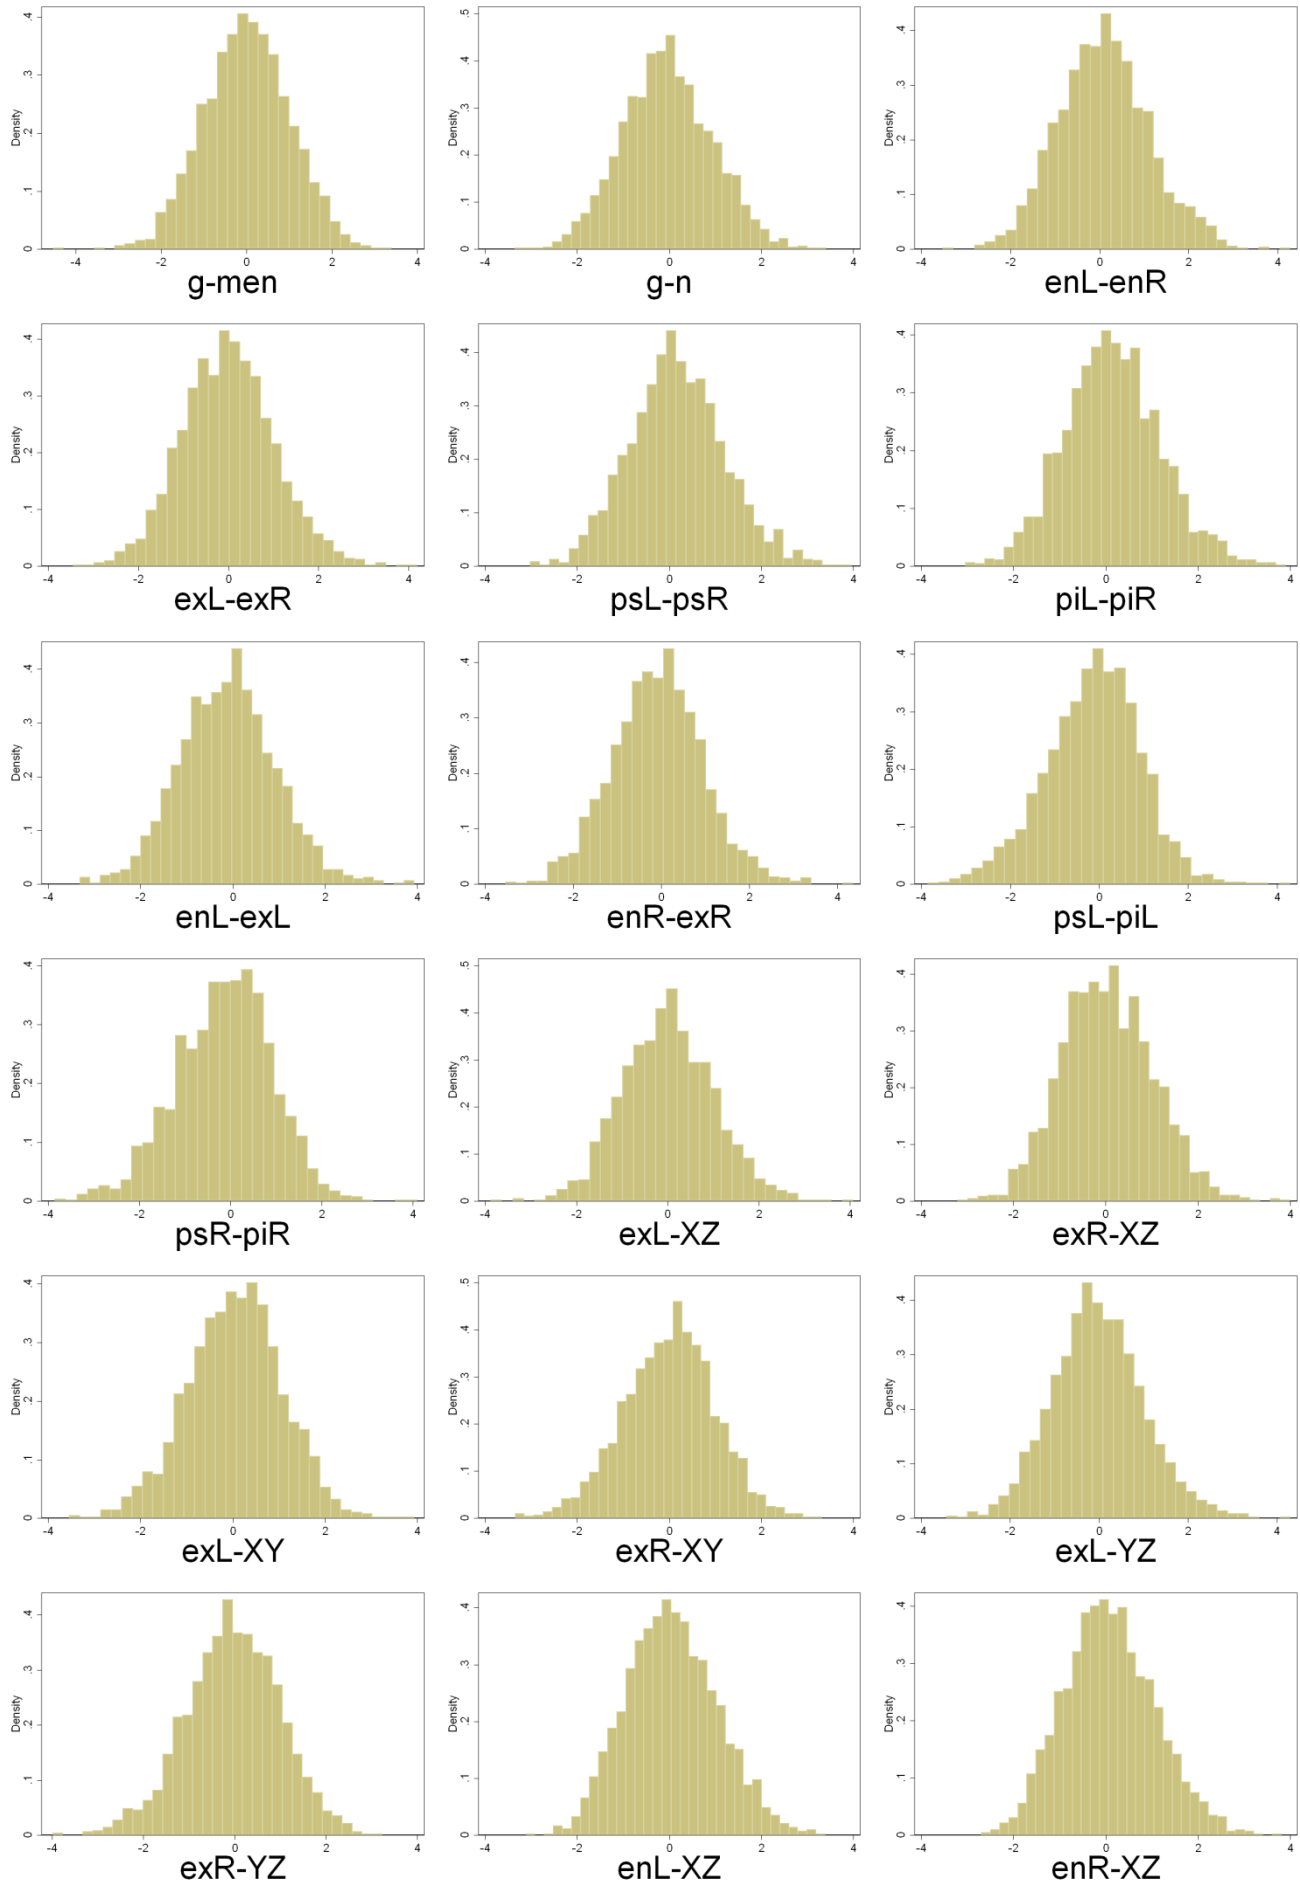





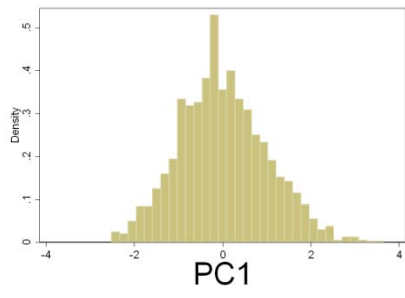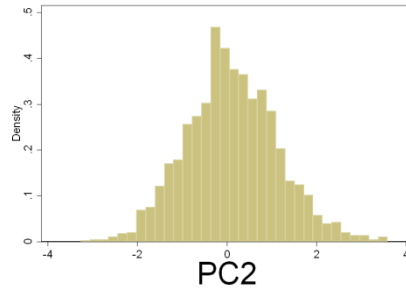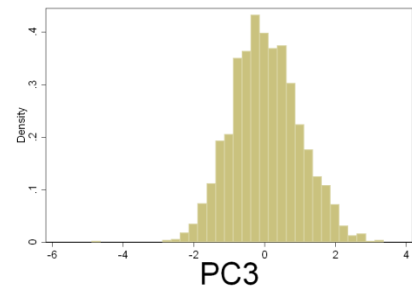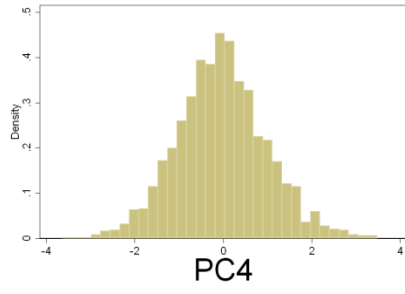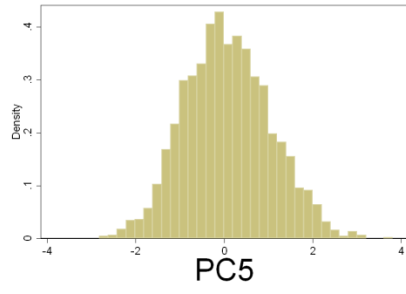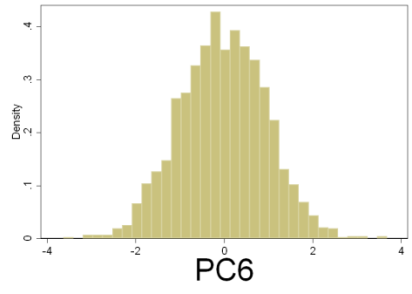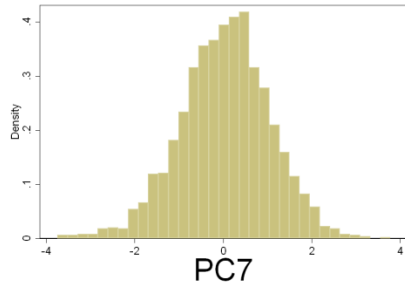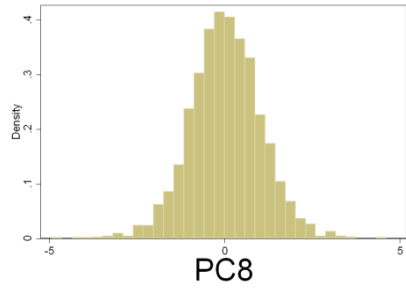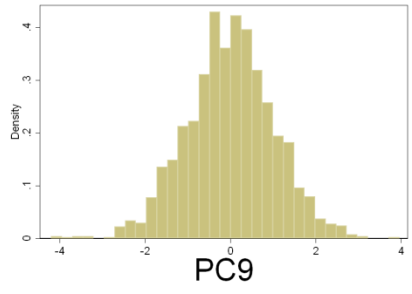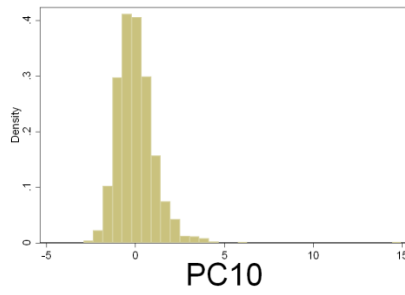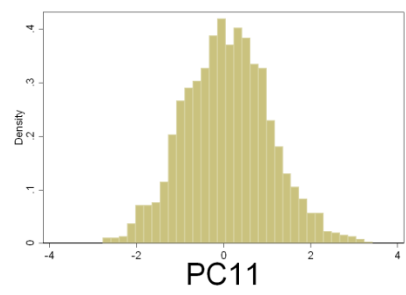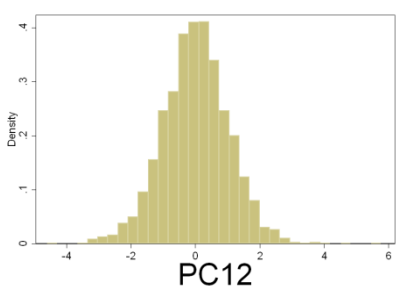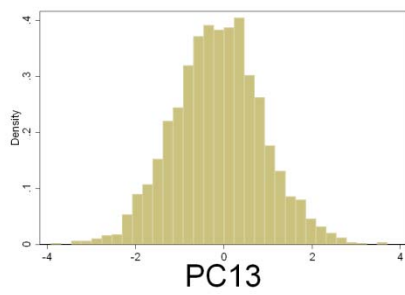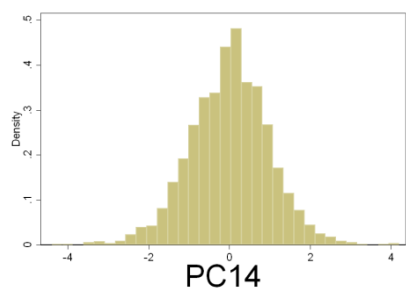

a.

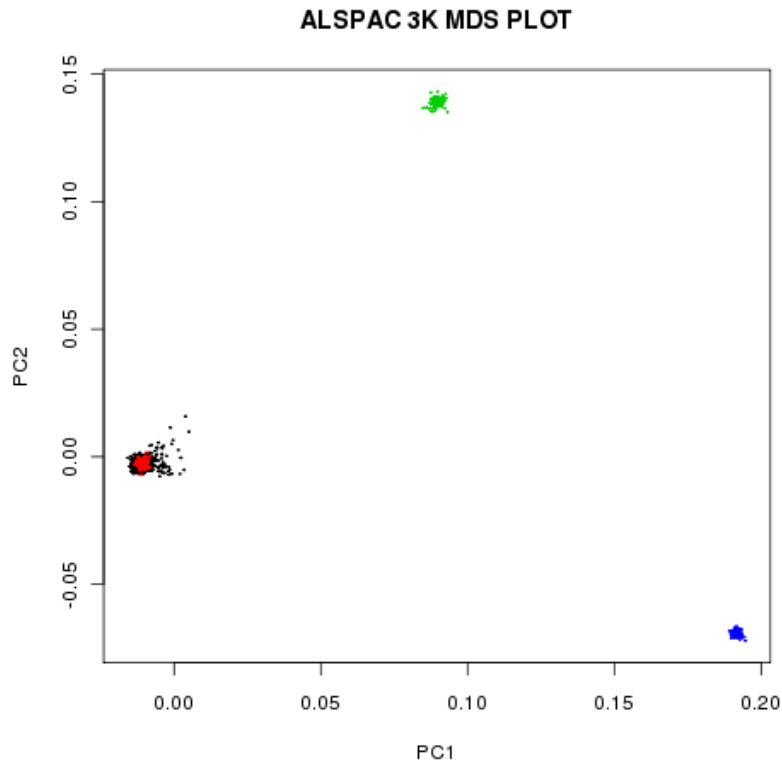

b.

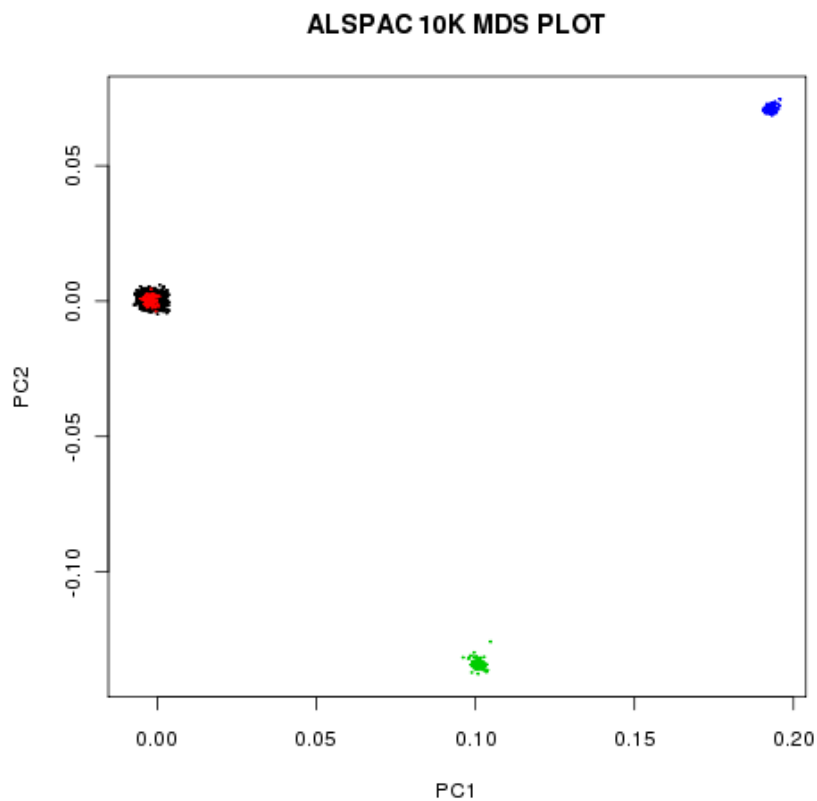

**Figure S2. Multidimensional scaling (MDS) analysis plots for the individuals included in the (a) discovery and (b) replication analyses.** Black points are the current participants, red points are the HapMap CEU individuals, green points are the Hapmap JPT/CHB individuals, blue points are the HapMap YRI individuals. As can be seen by the clusters of included individuals a less strict exclusion criteria was applied in the discovery sample (and EIGENSTRAT PC1 and PC2 were included in the analyses as covariates). Stricter ethnicity exclusion criteria were used for the replication sample and so it was not necessary to adjust for EIGENSTRAT values in the analyses.

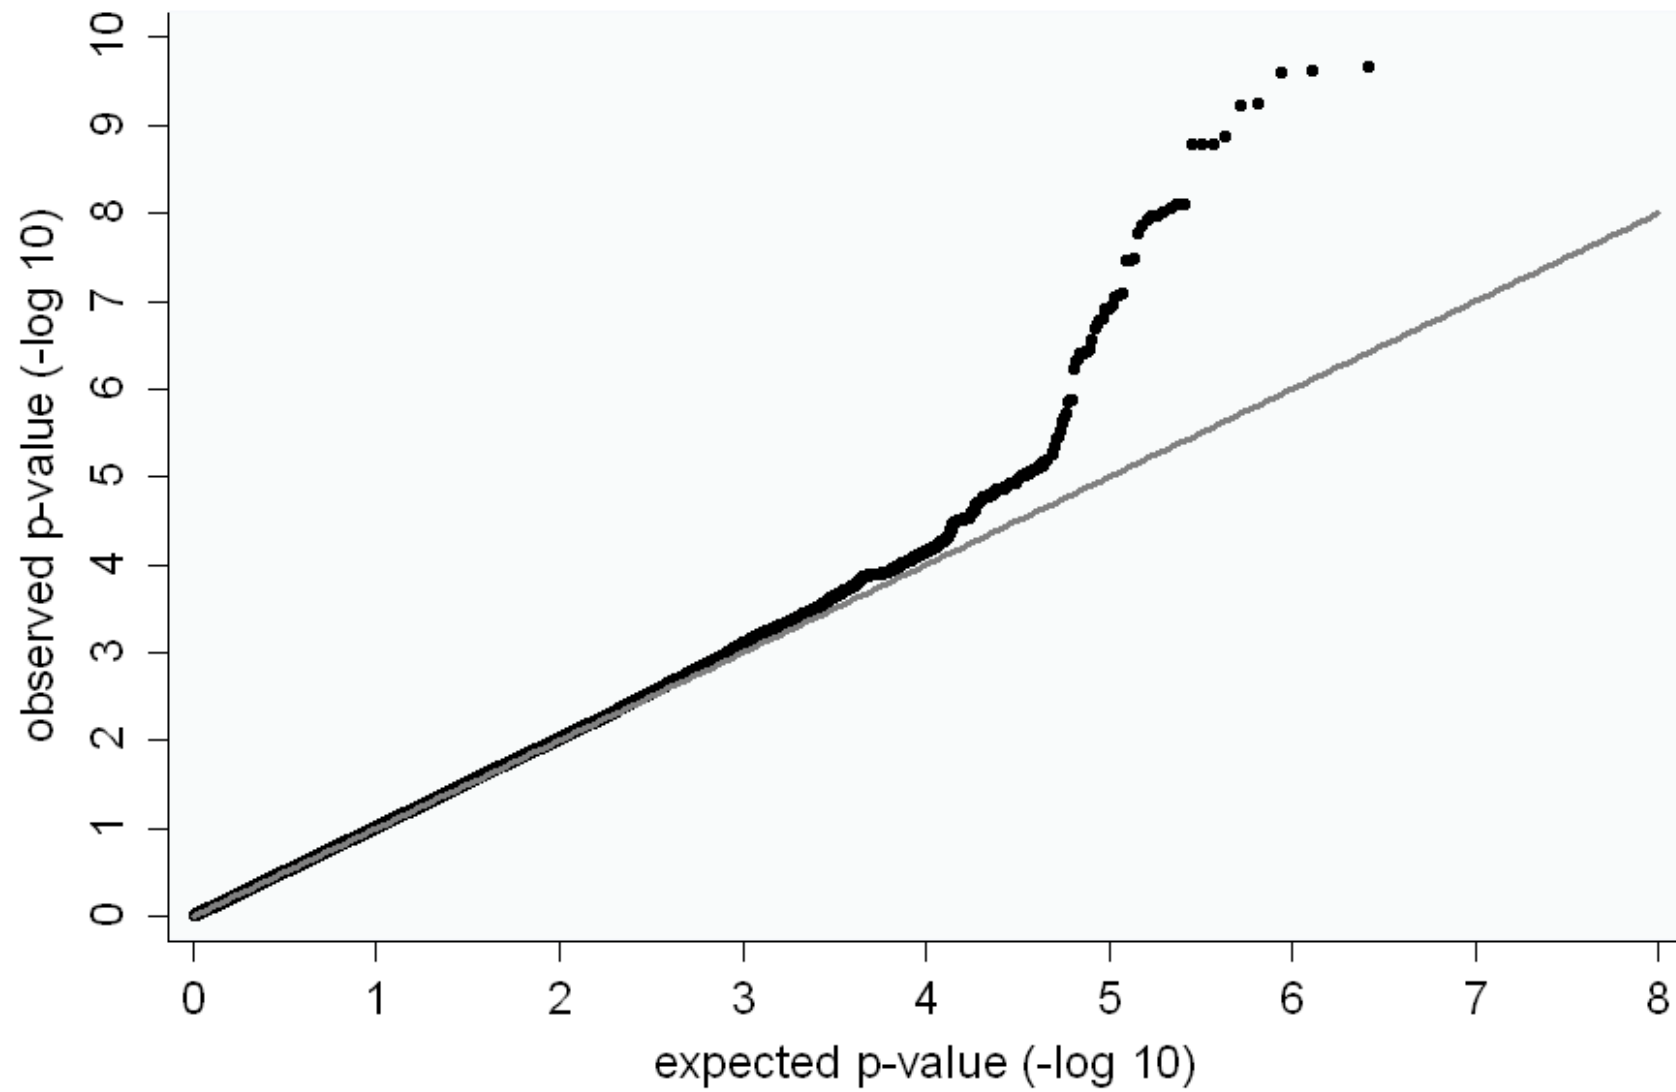

Figure S3. QQ plot for the n-men GWA. Lambda=1.02

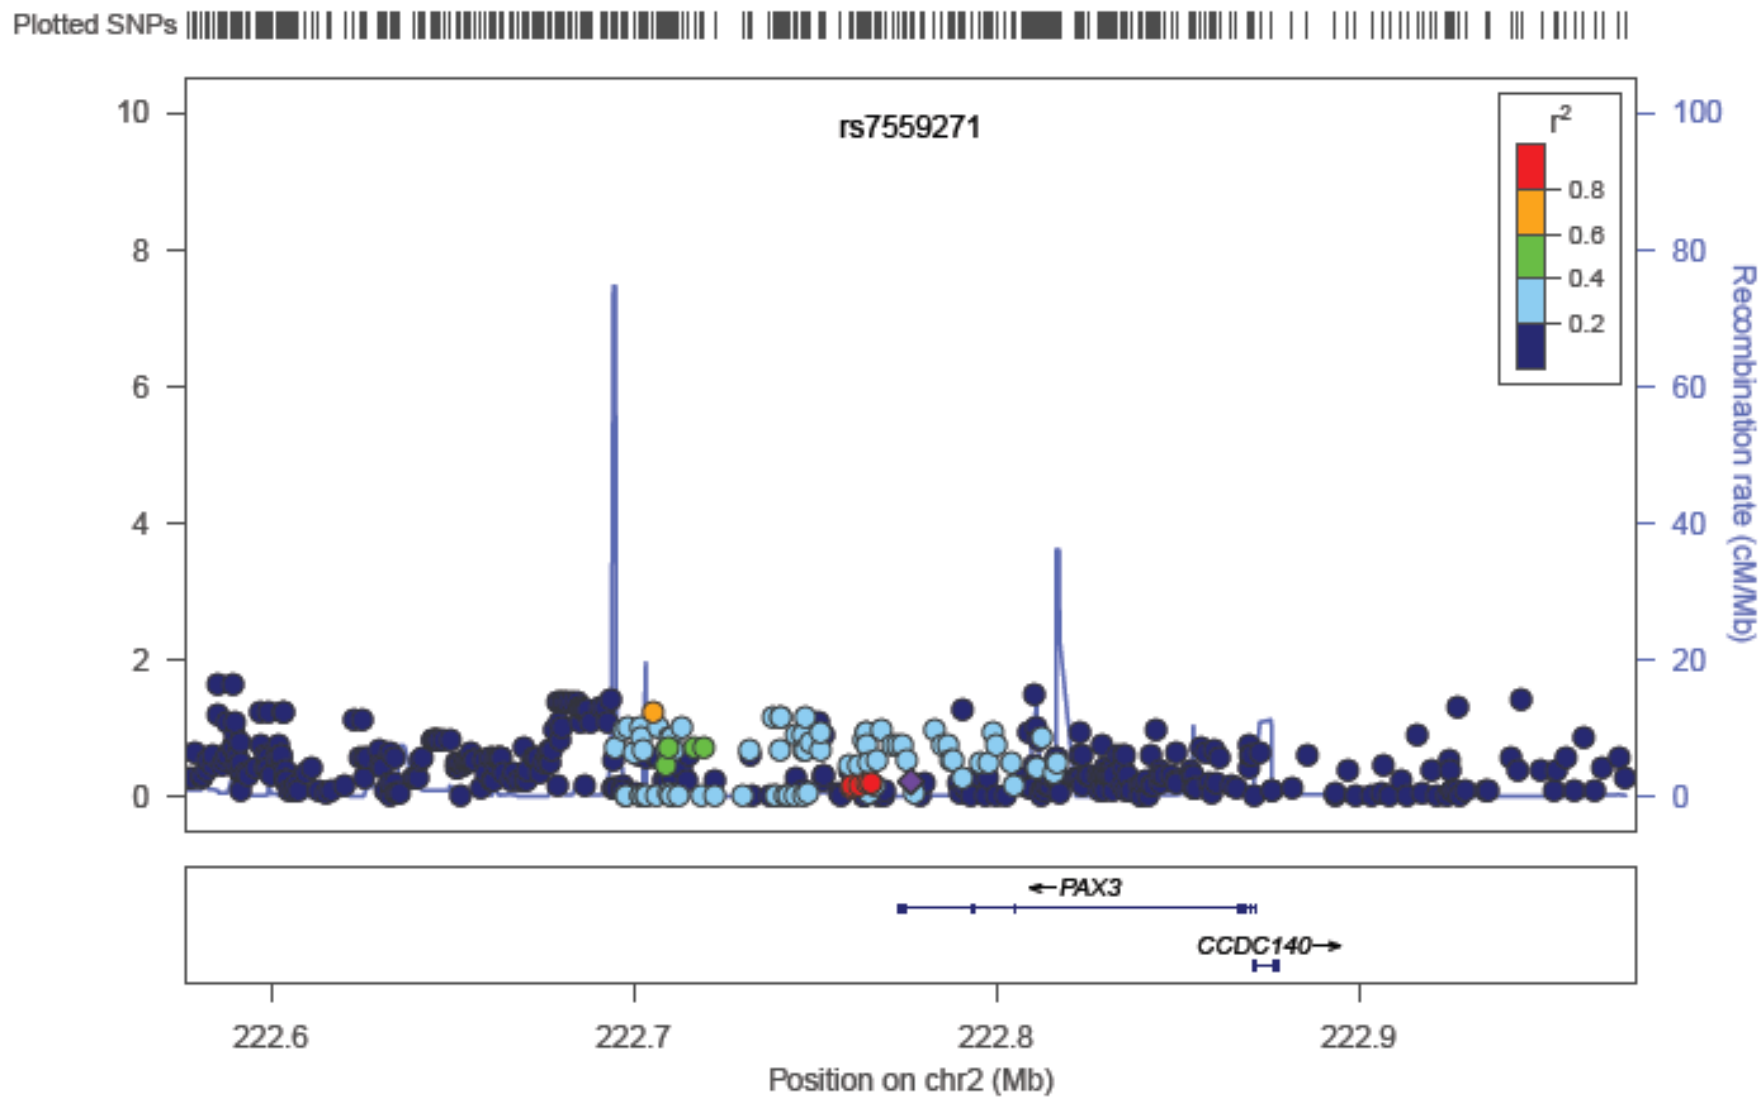

Figure S4. Association plot of the region surrounding *PAX3* for the inter-canthal width (enL-enR).



**Table S2. Principal Component Analysis (a) of Landmark Data and (b) brief description of the principal components extracted for the total sample.**

a.

| PC   | x-y-z | Principal Components |       |       |       |       |       |       |       |       |       |       |       |       |       |
|------|-------|----------------------|-------|-------|-------|-------|-------|-------|-------|-------|-------|-------|-------|-------|-------|
|      |       | 1                    | 2     | 3     | 4     | 5     | 6     | 7     | 8     | 9     | 10    | 11    | 12    | 13    | 14    |
| PC1  | lsy   | -.851                |       | .260  |       |       |       |       |       |       | .186  |       |       |       |       |
|      | cphRy | -.843                |       | .243  |       |       | .102  |       |       | .126  |       |       |       |       |       |
|      | cphLy | -.841                |       | .240  |       |       | .107  |       |       | .137  |       |       |       |       |       |
|      | enLy  | .834                 | .138  | -.112 | .165  | -.200 | -.155 |       |       |       |       |       |       |       | -.105 |
|      | enRy  | .829                 | .160  | -.108 | .153  | -.176 | -.180 |       |       |       |       |       | .106  |       | .116  |
|      | pgy   | -.822                | -.155 |       |       |       | -.187 |       |       |       |       |       |       |       |       |
|      | chRy  | -.816                | -.190 |       | -.214 |       |       |       |       |       |       |       |       |       |       |
|      | chLy  | -.814                | -.180 |       | -.221 |       |       | -.100 |       |       |       |       |       |       |       |
|      | piRy  | .810                 |       |       | .154  | -.151 | -.256 |       |       |       |       |       | .125  | -.100 | .168  |
|      | piLy  | .808                 |       |       | .165  | -.170 | -.254 |       |       |       |       |       | -.137 | -.104 | -.162 |
|      | psLy  | .792                 |       |       |       |       | -.278 |       |       |       |       |       | -.123 | .332  | -.126 |
|      | psRy  | .783                 |       |       |       |       | -.276 |       |       |       |       |       | .112  | .335  | .181  |
|      | liy   | -.769                | -.124 |       | -.386 |       |       |       |       |       |       |       |       |       |       |
|      | exRy  | .759                 |       |       | .189  | -.210 | -.309 |       |       |       |       |       | .145  |       | .197  |
| exLy | .748  |                      |       | .194  | -.173 | -.313 |       |       |       |       |       | -.184 |       | -.220 |       |
| gy   | .644  | .223                 |       |       | .308  | -.130 |       |       |       |       |       |       | -.192 |       |       |
| ny   | .620  | .132                 | -.468 |       | .123  |       |       |       |       |       |       | -.145 |       |       |       |
| PC2  | psLx  | .143                 | .939  |       |       |       |       |       |       | -.125 |       |       |       |       |       |
|      | psRx  | -.139                | -.939 |       |       |       |       |       |       | -.116 |       |       |       |       |       |
|      | piLx  | .144                 | .933  |       |       |       |       |       |       | -.135 |       |       |       |       |       |
|      | piRx  | -.150                | -.932 |       |       |       |       |       |       | -.127 |       |       | -.126 |       |       |
|      | enRx  |                      | -.837 |       |       | .129  |       |       |       | -.168 |       |       |       | .219  |       |
|      | enLx  | .102                 | .830  |       |       | -.108 |       |       |       | -.126 |       |       |       | -.225 |       |
| PC3  | exRx  | -.192                | -.810 |       |       |       |       |       | .123  |       |       |       | -.116 | -.391 |       |
|      | exLx  | .184                 | .768  |       |       |       |       |       | -.123 | -.148 |       | .140  | .432  |       |       |
|      | alLz  | .209                 |       | -.798 |       | -.101 | -.171 | -.130 |       |       |       |       | -.136 |       |       |
|      | alRz  | .220                 |       | -.786 |       |       | -.152 | -.144 |       |       |       |       | -.132 |       |       |
|      | snz   | .347                 |       | -.706 | .260  | -.144 |       | -.150 |       |       |       |       | -.113 |       |       |
| PC4  | prnz  | .404                 |       | -.690 |       | -.253 | -.138 | -.204 |       |       |       |       | -.185 |       |       |
|      | liz   | .295                 |       | .562  |       |       |       | -.239 |       |       |       |       |       |       |       |
|      | lsz   | .368                 |       |       | .863  |       |       | -.102 |       |       | -.163 |       |       |       |       |
|      | cphRz | .391                 |       |       | .861  | -.112 |       | -.110 |       |       |       |       |       | -.109 |       |
| PC5  | cphLz | .388                 |       |       | .861  | -.117 |       |       |       |       |       |       |       |       |       |
|      | pgz   | -.151                |       | .271  | -.788 |       | -.195 | -.321 |       |       |       |       |       |       |       |
|      | gz    | -.103                | .198  | .176  |       | -.858 |       |       |       |       |       |       | -.148 | .158  |       |
|      | nz    |                      | .157  | -.163 |       | -.822 | .103  |       |       |       |       |       | -.299 | .167  |       |
|      | piRz  | -.374                |       | .352  | -.245 | .673  |       |       |       |       |       | .114  | -.120 |       |       |
| PC6  | piLz  | -.376                |       | .349  | -.242 | .659  |       |       | .117  |       | .114  | .105  | -.111 | .119  |       |
|      | enLz  | -.469                |       | .244  | -.191 | .521  | .154  |       | .111  |       | .105  |       | -.139 | .274  |       |
|      | enRz  | -.458                |       | .250  | -.185 | .485  | .167  |       |       | -.105 |       |       | -.140 | .321  |       |
|      | prny  |                      |       |       |       | .120  | .821  |       |       |       |       |       | .106  |       |       |
| PC7  | alLy  | -.284                |       |       |       |       | .791  |       | -.108 |       |       |       |       |       |       |
|      | alRy  | -.299                |       |       |       |       | .768  |       |       |       |       |       |       |       |       |
|      | sny   | -.226                |       | .184  |       |       | .722  |       |       |       |       |       | .162  |       |       |
| PC8  | chRx  | -.123                | -.128 |       |       |       |       |       |       |       | .196  |       |       |       |       |
|      | chLx  | .139                 | .145  |       |       |       |       |       |       |       | -.205 |       |       |       |       |
|      | chLz  | .203                 |       | .230  |       |       |       |       |       |       |       |       | -.124 |       |       |
|      | chRz  | .195                 |       | .225  |       |       |       |       |       |       |       |       | .145  |       |       |
| PC9  | snx   |                      |       |       |       |       |       |       | .940  |       |       |       |       |       |       |
|      | prnx  |                      |       |       |       |       |       |       | .906  | .167  |       |       |       | -.139 |       |
| PC10 | gx    |                      |       |       |       |       |       |       |       |       | .974  |       |       |       |       |
|      | nx    |                      |       |       |       |       |       |       |       |       | .967  |       |       |       |       |
| PC11 | cphRx | -.164                |       |       |       |       | .183  |       |       |       | .809  |       | .312  |       |       |
|      | cphLx | .147                 |       |       |       |       | -.199 |       |       |       | -.768 |       | .422  |       |       |
|      | alLx  | .266                 | .321  |       | .158  | -.163 | -.219 | .266  |       |       | -.488 | .188  |       |       |       |
| PC12 | alRx  | -.275                | -.332 |       | -.162 | .158  | .219  | .265  |       |       | .481  | -.189 |       |       |       |
|      | psLz  | -.275                |       | .207  |       | .101  | .219  |       | .109  |       |       | .805  | .109  |       |       |
| PC13 | psRz  | -.288                |       | .237  |       |       | .209  |       | -.116 |       |       | .784  | -.125 |       |       |
|      | lsx   |                      |       |       |       |       |       |       |       |       |       |       | .942  |       |       |
| PC14 | exLz  | -.307                | -.252 | .278  | -.172 | .369  |       |       | .166  | .105  |       |       | .161  | -.618 |       |
|      | exRz  | -.320                | -.290 | .287  | -.186 | .368  | .109  |       | -.129 | -.118 |       |       | -.146 | -.598 |       |
| PC14 | pgx   |                      |       |       |       |       |       |       | -.180 |       |       |       |       | -.153 | .926  |
|      | lix   |                      |       |       |       |       |       |       | -.104 |       |       |       |       | .486  | .775  |

The highlighted cells (coefficients > 0.5 in magnitude) indicate landmark coordinates that contribute greatly to the facial variation; non-highlighted cells (coefficients < 0.5 in magnitude) indicate landmark coordinates that have less effect on facial variation (coefficients in the range 0.1 - 0.49 in magnitude are presented and coefficients < 0.1 in magnitude are not shown).

b.

| <b>Principal Components</b>                                      | <b>Percentage of variance</b> |
|------------------------------------------------------------------|-------------------------------|
| <b>PC1</b> , Face Height                                         | 28.8                          |
| <b>PC2</b> , Inter-Eyes Distance (Face Width)                    | 10.4                          |
| <b>PC3</b> , Prominence of the nose                              | 6.7                           |
| <b>PC4</b> , Protrusion of the upper lip relative to the chin    | 5.3                           |
| <b>PC5</b> , Prominence of the eyes relative to the nasal bridge | 4.8                           |
| <b>PC6</b> , Vertical height of the nose                         | 4.4                           |
| <b>PC7</b> , Ratio of the mouth width to mouth depth             | 4.0                           |
| <b>PC8</b> , Deviation of the nasal tip and columella base       | 3.6                           |
| <b>PC9</b> , Horizontal asymmetry of the nasal bridge            | 3.2                           |
| <b>PC10</b> , Philtrum-to-nose width ratio                       | 2.7                           |
| <b>PC11</b> , Prominence of the upper eyelids                    | 2.4                           |
| <b>PC12</b> , Horizontal asymmetry of the upper lip (philtrum)   | 2.3                           |
| <b>PC13</b> , Facial flatness (outer canthi depth)               | 1.9                           |
| <b>PC14</b> , Horizontal asymmetry of the chin and lower lip     | 1.7                           |

**Table S3. Discovery results for all associations with  $p < 5 \times 10^{-7}$ . Associations taken forward to replication are shaded grey.**

| Trait   | SNP        | Chr | position  | Allele 1,2 | Allele 1 freq | R2     | Beta (allele 2) | SE    | P-value  |
|---------|------------|-----|-----------|------------|---------------|--------|-----------------|-------|----------|
| g-men   | rs12146102 | 1   | 114601393 | A,G        | 0.9062        | 0.8141 | 0.283           | 0.055 | 2.74E-07 |
| g-men   | rs6666714  | 1   | 114596380 | C,T        | 0.9073        | 0.8371 | 0.281           | 0.055 | 2.82E-07 |
| enL-exR | rs3828294  | 2   | 207338149 | A,G        | 0.2572        | 0.9902 | 0.171           | 0.034 | 4.64E-07 |
| exL-exR | rs4716593  | 7   | 155704176 | A,G        | 0.3727        | 0.9992 | -0.164          | 0.032 | 2.65E-07 |
| exL-exR | rs4717020  | 7   | 155704226 | A,G        | 0.3727        | 0.999  | -0.164          | 0.032 | 2.68E-07 |
| exL-exR | rs4717021  | 7   | 155704640 | C,T        | 0.6272        | 0.9987 | 0.163           | 0.032 | 2.76E-07 |
| exL-exR | rs12050594 | 15  | 48560028  | A,T        | 0.869         | 0.8501 | -0.254          | 0.05  | 3.62E-07 |
| psR-piR | rs4375631  | 15  | 85239778  | C,T        | 0.0625        | 0.4648 | 0.504           | 0.1   | 4.31E-07 |
| exR.yz  | rs4716593  | 7   | 155704176 | A,G        | 0.3727        | 0.9992 | 0.165           | 0.032 | 2.30E-07 |
| exR.yz  | rs4717020  | 7   | 155704226 | A,G        | 0.3727        | 0.999  | 0.165           | 0.032 | 2.33E-07 |
| exR.yz  | rs4717021  | 7   | 155704640 | C,T        | 0.6272        | 0.9987 | -0.165          | 0.032 | 2.40E-07 |
| exR.yz  | rs2901850  | 2   | 77637083  | G,T        | 0.8246        | 0.9463 | -0.207          | 0.041 | 4.58E-07 |
| enL.xz  | rs9907335  | 17  | 62359090  | A,G        | 0.5217        | 0.8718 | -0.137          | 0.026 | 1.61E-07 |
| enR.yz  | rs10862567 | 12  | 81946483  | A,T        | 0.6875        | 0.963  | 0.181           | 0.033 | 4.43E-08 |
| enR.yz  | rs10746265 | 12  | 81944579  | C,G        | 0.3126        | 0.9701 | -0.18           | 0.033 | 4.76E-08 |
| enR.yz  | rs892540   | 12  | 81941606  | C,T        | 0.6881        | 0.9779 | 0.179           | 0.033 | 5.43E-08 |
| enR.yz  | rs2020370  | 12  | 81942025  | A,G        | 0.6871        | 0.9937 | 0.176           | 0.033 | 6.02E-08 |
| enR.yz  | rs10862569 | 12  | 81947239  | A,T        | 0.3428        | 0.871  | -0.182          | 0.034 | 9.68E-08 |
| enR.yz  | rs10862568 | 12  | 81946655  | A,G        | 0.3432        | 0.8938 | -0.178          | 0.034 | 1.22E-07 |
| enR.yz  | rs11115550 | 12  | 81946617  | C,T        | 0.6565        | 0.9142 | 0.175           | 0.033 | 1.50E-07 |
| enR.yz  | rs10862566 | 12  | 81946435  | C,T        | 0.6564        | 0.9187 | 0.174           | 0.033 | 1.56E-07 |
| enR.yz  | rs4374000  | 12  | 81945470  | A,C        | 0.3436        | 0.9192 | -0.174          | 0.033 | 1.57E-07 |
| enR.yz  | rs10862545 | 12  | 81939361  | A,T        | 0.6586        | 0.9095 | 0.175           | 0.033 | 1.63E-07 |
| enR.yz  | rs10862548 | 12  | 81939850  | C,G        | 0.6576        | 0.9212 | 0.173           | 0.033 | 1.73E-07 |
| enR.yz  | rs7965643  | 12  | 81938025  | C,T        | 0.6445        | 0.894  | 0.174           | 0.033 | 1.74E-07 |
| enR.yz  | rs17740709 | 12  | 81947471  | A,G        | 0.7991        | 0.8368 | 0.216           | 0.041 | 1.75E-07 |
| enR.yz  | rs10862560 | 12  | 81943799  | C,T        | 0.6562        | 0.9341 | 0.172           | 0.033 | 1.81E-07 |
| enR.yz  | rs11115544 | 12  | 81943635  | A,G        | 0.3438        | 0.936  | -0.171          | 0.033 | 1.84E-07 |
| enR.yz  | rs11115545 | 12  | 81943731  | A,G        | 0.3438        | 0.9353 | -0.171          | 0.033 | 1.84E-07 |
| enR.yz  | rs11115542 | 12  | 81943390  | A,G        | 0.3439        | 0.9425 | -0.17           | 0.033 | 1.95E-07 |
| enR.yz  | rs3913351  | 15  | 85556598  | A,G        | 0.4223        | 0.9984 | -0.161          | 0.031 | 2.37E-07 |
| enR.yz  | rs7176553  | 15  | 85549546  | A,T        | 0.5773        | 0.9863 | 0.161           | 0.031 | 2.81E-07 |
| enR.yz  | rs12101402 | 15  | 85543102  | A,G        | 0.5774        | 0.9839 | 0.161           | 0.031 | 2.83E-07 |
| enR.yz  | rs17796608 | 12  | 81938282  | C,T        | 0.2131        | 0.8633 | -0.203          | 0.04  | 3.52E-07 |
| n-men   | rs7559271  | 2   | 222776530 | A,G        | 0.6156        | 0.9956 | 0.169           | 0.027 | 2.20E-10 |
| n-men   | rs6741414  | 2   | 222765382 | C,G        | 0.3841        | 0.9926 | -0.169          | 0.027 | 2.42E-10 |
| n-men   | rs10209141 | 2   | 222764612 | A,C        | 0.3839        | 0.9914 | -0.169          | 0.027 | 2.55E-10 |
| n-men   | rs10178871 | 2   | 222762245 | A,G        | 0.6179        | 0.9881 | 0.166           | 0.027 | 5.75E-10 |
| n-men   | rs11677206 | 2   | 222760227 | C,T        | 0.382         | 0.9884 | -0.166          | 0.027 | 6.07E-10 |
| n-men   | rs10176525 | 2   | 222747296 | A,T        | 0.2395        | 0.9647 | -0.191          | 0.031 | 1.37E-09 |
| n-men   | rs986430   | 2   | 222740886 | G,T        | 0.7605        | 0.9676 | 0.19            | 0.031 | 1.65E-09 |
| n-men   | rs986429   | 2   | 222740643 | A,T        | 0.2395        | 0.9676 | -0.189          | 0.031 | 1.65E-09 |
| n-men   | rs1370926  | 2   | 222738746 | C,G        | 0.7605        | 0.9676 | 0.189           | 0.031 | 1.68E-09 |
| n-men   | rs6730989  | 2   | 222787588 | A,G        | 0.154         | 0.9986 | -0.21           | 0.036 | 8.05E-09 |
| n-men   | rs2578449  | 2   | 222788436 | A,G        | 0.154         | 0.9986 | -0.21           | 0.036 | 8.07E-09 |
| n-men   | rs2855268  | 2   | 222775163 | C,G        | 0.8459        | 0.9962 | 0.209           | 0.036 | 8.77E-09 |
| n-men   | rs7597751  | 2   | 222767149 | C,T        | 0.8458        | 0.9938 | 0.209           | 0.036 | 9.81E-09 |
| n-men   | rs10209300 | 2   | 222764744 | A,G        | 0.8458        | 0.9923 | 0.209           | 0.036 | 1.07E-08 |
| n-men   | rs7590866  | 2   | 222795573 | A,G        | 0.1541        | 0.9974 | -0.208          | 0.036 | 1.11E-08 |
| n-men   | rs13410020 | 2   | 222811181 | A,G        | 0.1488        | 0.7776 | -0.236          | 0.042 | 1.22E-08 |
| n-men   | rs17401668 | 2   | 222797983 | A,G        | 0.8459        | 0.997  | 0.206           | 0.036 | 1.40E-08 |
| n-men   | rs1549773  | 2   | 222804212 | C,T        | 0.8459        | 0.9971 | 0.205           | 0.036 | 1.71E-08 |
| n-men   | rs6728938  | 2   | 222762001 | C,T        | 0.8452        | 0.9884 | 0.202           | 0.037 | 3.38E-08 |
| n-men   | rs1430655  | 2   | 222811792 | A,G        | 0.111         | 0.932  | -0.238          | 0.043 | 3.57E-08 |
| n-men   | rs10169326 | 2   | 222759746 | A,G        | 0.1548        | 0.9879 | -0.202          | 0.037 | 3.59E-08 |
| n-men   | rs1438605  | 2   | 222751581 | A,G        | 0.855         | 0.9405 | 0.209           | 0.039 | 8.23E-08 |
| n-men   | rs10211404 | 2   | 222747424 | A,G        | 0.1451        | 0.943  | -0.209          | 0.039 | 8.99E-08 |
| n-men   | rs13388386 | 2   | 222812662 | A,G        | 0.8886        | 0.9778 | 0.225           | 0.042 | 9.08E-08 |
| n-men   | rs10210971 | 2   | 222747139 | C,T        | 0.8547        | 0.9495 | 0.206           | 0.039 | 1.12E-07 |
| n-men   | rs7607981  | 2   | 222740246 | C,T        | 0.8546        | 0.9522 | 0.205           | 0.039 | 1.24E-07 |
| n-men   | rs7608778  | 2   | 222731823 | C,T        | 0.1455        | 0.9523 | -0.205          | 0.039 | 1.27E-07 |
| n-men   | rs13385121 | 2   | 222710949 | A,G        | 0.8543        | 0.95   | 0.204           | 0.039 | 1.62E-07 |
| n-men   | rs10932943 | 2   | 222709305 | A,G        | 0.1458        | 0.9459 | -0.204          | 0.039 | 1.72E-07 |
| n-men   | rs6749789  | 2   | 222702465 | A,G        | 0.1461        | 0.9325 | -0.204          | 0.039 | 1.88E-07 |
| n-men   | rs11886961 | 2   | 222700162 | C,G        | 0.8535        | 0.9162 | 0.205           | 0.039 | 2.03E-07 |
| n-men   | rs6757456  | 2   | 222695072 | C,T        | 0.1461        | 0.7332 | -0.226          | 0.044 | 2.75E-07 |

|           |            |    |           |     |        |        |        |       |          |
|-----------|------------|----|-----------|-----|--------|--------|--------|-------|----------|
| n-men     | rs7588554  | 2  | 222782895 | A,G | 0.5819 | 0.9975 | -0.137 | 0.027 | 3.72E-07 |
| n-men     | rs1438607  | 2  | 222768195 | A,G | 0.5815 | 0.9941 | -0.137 | 0.027 | 3.77E-07 |
| n-men     | rs10208761 | 2  | 222764220 | A,C | 0.5809 | 0.9901 | -0.137 | 0.027 | 3.92E-07 |
| n-men     | rs10498131 | 2  | 222764049 | A,G | 0.4191 | 0.99   | 0.137  | 0.027 | 3.92E-07 |
| n-men     | rs2894450  | 2  | 222705348 | A,G | 0.6015 | 0.9848 | 0.137  | 0.027 | 3.93E-07 |
| n-men     | rs1013262  | 2  | 222799023 | G,T | 0.4182 | 0.9916 | 0.136  | 0.027 | 4.67E-07 |
| n-men     | rs13023573 | 2  | 222763470 | A,C | 0.5792 | 0.9844 | -0.136 | 0.027 | 4.86E-07 |
| sn-men    | rs4832657  | 2  | 16590220  | C,T | 0.7276 | 0.9604 | 0.154  | 0.03  | 2.68E-07 |
| sn-men    | rs6761778  | 2  | 16580947  | C,T | 0.7281 | 0.9796 | 0.152  | 0.03  | 2.87E-07 |
| sn-men    | rs2067702  | 2  | 16582375  | A,G | 0.7281 | 0.9791 | 0.152  | 0.03  | 2.87E-07 |
| sn-men    | rs7573656  | 2  | 16598913  | A,G | 0.2737 | 0.9129 | -0.157 | 0.031 | 3.01E-07 |
| sn-men    | rs7552     | 2  | 16597409  | A,G | 0.7095 | 0.883  | 0.156  | 0.031 | 3.25E-07 |
| sn-men    | rs5007483  | 2  | 16597006  | G,T | 0.7318 | 0.9242 | 0.155  | 0.031 | 4.42E-07 |
| prn-sn    | rs12532887 | 7  | 88040653  | A,T | 0.0136 | 0.406  | -1.059 | 0.197 | 7.16E-08 |
| prn-all   | rs11738462 | 5  | 61049533  | A,G | 0.1701 | 0.996  | 0.204  | 0.036 | 1.77E-08 |
| prn-all   | rs12521924 | 5  | 61046695  | A,G | 0.17   | 0.9978 | 0.204  | 0.036 | 1.77E-08 |
| prn-all   | rs13154578 | 5  | 61049025  | A,T | 0.83   | 0.9967 | -0.204 | 0.036 | 1.77E-08 |
| prn-all   | rs13159935 | 5  | 61046869  | C,T | 0.17   | 0.9983 | 0.204  | 0.036 | 1.79E-08 |
| prn-all   | rs12514378 | 5  | 61046957  | C,T | 0.17   | 0.9985 | 0.204  | 0.036 | 1.80E-08 |
| prn-all   | rs1982862  | 3  | 55039780  | A,C | 0.1249 | 0.7971 | 0.258  | 0.046 | 1.82E-08 |
| prn-all   | rs13160822 | 5  | 61043203  | G,T | 0.8485 | 0.809  | -0.231 | 0.042 | 4.55E-08 |
| prn-all   | rs7704929  | 5  | 61007579  | A,G | 0.809  | 0.9726 | -0.189 | 0.035 | 8.25E-08 |
| prn-all   | rs11746049 | 5  | 61008040  | C,T | 0.8115 | 0.9816 | -0.188 | 0.035 | 8.43E-08 |
| prn-all   | rs13175459 | 5  | 61021456  | A,G | 0.8108 | 0.9972 | -0.186 | 0.035 | 8.46E-08 |
| prn-all   | rs11750644 | 5  | 61009820  | C,T | 0.1888 | 0.9937 | 0.187  | 0.035 | 8.50E-08 |
| prn-all   | rs11747208 | 5  | 61009334  | C,G | 0.1888 | 0.9933 | 0.187  | 0.035 | 8.50E-08 |
| prn-all   | rs1501845  | 5  | 61012367  | A,G | 0.8112 | 0.9989 | -0.186 | 0.035 | 8.51E-08 |
| prn-all   | rs11740126 | 5  | 61026710  | A,G | 0.1894 | 0.9967 | 0.185  | 0.035 | 9.45E-08 |
| prn-all   | rs13156637 | 5  | 61037146  | A,G | 0.8102 | 0.9952 | -0.184 | 0.035 | 1.08E-07 |
| prn-all   | rs12520360 | 5  | 61035117  | C,T | 0.1898 | 0.9954 | 0.184  | 0.035 | 1.08E-07 |
| prn-all   | rs11748959 | 5  | 61034436  | A,G | 0.8102 | 0.9955 | -0.184 | 0.035 | 1.10E-07 |
| prn-all   | rs4700430  | 5  | 61033066  | A,G | 0.1898 | 0.9957 | 0.184  | 0.035 | 1.12E-07 |
| prn-all   | rs13163936 | 5  | 61031899  | A,G | 0.1898 | 0.996  | 0.184  | 0.035 | 1.14E-07 |
| prn-all   | rs6870236  | 5  | 61031633  | C,T | 0.8102 | 0.9961 | -0.184 | 0.035 | 1.15E-07 |
| prn-all   | rs13186555 | 5  | 61030794  | C,T | 0.8103 | 0.9967 | -0.184 | 0.035 | 1.18E-07 |
| prn-all   | rs11747263 | 5  | 61030624  | C,T | 0.1897 | 0.9967 | 0.184  | 0.035 | 1.19E-07 |
| prn-all   | rs11743702 | 5  | 61030585  | A,G | 0.1897 | 0.9969 | 0.184  | 0.035 | 1.20E-07 |
| prn-all   | rs4855096  | 3  | 180798461 | G,T | 0.5364 | 0.9956 | -0.139 | 0.027 | 3.32E-07 |
| prn-all   | rs9831673  | 3  | 180796256 | C,T | 0.5426 | 0.9765 | -0.141 | 0.028 | 3.32E-07 |
| prn-all   | rs6790272  | 3  | 180772123 | A,C | 0.4637 | 0.9896 | 0.14   | 0.027 | 3.34E-07 |
| prn-all   | rs7630170  | 3  | 180812289 | A,G | 0.5364 | 0.9971 | -0.139 | 0.027 | 3.34E-07 |
| prn-all   | rs9883607  | 3  | 180813386 | A,G | 0.4636 | 0.9977 | 0.139  | 0.027 | 3.35E-07 |
| prn-all   | rs9816801  | 3  | 180762075 | C,G | 0.536  | 0.9791 | -0.14  | 0.027 | 3.45E-07 |
| ls-cphL   | rs10822139 | 10 | 52462200  | A,G | 0.689  | 0.9708 | 0.169  | 0.032 | 1.04E-07 |
| cphL-cphR | rs10822139 | 10 | 52462200  | A,G | 0.689  | 0.9708 | 0.156  | 0.031 | 4.90E-07 |
| chL-chR   | rs4717019  | 7  | 155703821 | G,T | 0.3941 | 0.955  | -0.166 | 0.031 | 5.96E-08 |
| chL-chR   | rs4717018  | 7  | 155703260 | C,T | 0.606  | 0.9547 | 0.166  | 0.031 | 6.02E-08 |
| chL-chR   | rs4717017  | 7  | 155703058 | A,G | 0.403  | 0.9535 | -0.163 | 0.031 | 1.04E-07 |
| chL-chR   | rs6698642  | 1  | 19128258  | C,T | 0.8352 | 0.9992 | -0.208 | 0.04  | 2.32E-07 |
| chL-chR   | rs4717023  | 7  | 155707483 | A,T | 0.3693 | 0.9968 | -0.155 | 0.031 | 4.06E-07 |
| chL-chR   | rs4716593  | 7  | 155704176 | A,G | 0.3727 | 0.9992 | -0.154 | 0.031 | 4.75E-07 |
| chL-chR   | rs4717020  | 7  | 155704226 | A,G | 0.3727 | 0.999  | -0.154 | 0.031 | 4.78E-07 |
| chL-chR   | rs4717021  | 7  | 155704640 | C,T | 0.6272 | 0.9987 | 0.154  | 0.031 | 4.84E-07 |
| chr-li    | rs9599075  | 13 | 65624171  | A,T | 0.7905 | 0.8865 | 0.188  | 0.037 | 4.04E-07 |
| ls-men    | rs12997119 | 2  | 16597765  | C,T | 0.2246 | 0.9136 | -0.156 | 0.03  | 2.52E-07 |
| li-men    | rs7158989  | 14 | 54655311  | C,T | 0.9035 | 0.954  | -0.224 | 0.044 | 3.99E-07 |
| pg-n      | rs3012485  | 10 | 17064855  | A,G | 0.0964 | 0.9972 | -0.231 | 0.045 | 3.14E-07 |
| pg-n      | rs3012486  | 10 | 17064965  | C,T | 0.0964 | 0.9964 | -0.231 | 0.045 | 3.14E-07 |
| pg-n      | rs3012487  | 10 | 17065000  | C,T | 0.0963 | 0.9956 | -0.231 | 0.045 | 3.15E-07 |
| pg-n      | rs3012490  | 10 | 17065651  | C,T | 0.0963 | 0.9948 | -0.231 | 0.045 | 3.15E-07 |
| pg-n      | rs3012488  | 10 | 17065113  | A,T | 0.9037 | 0.9951 | 0.231  | 0.045 | 3.15E-07 |
| pg-n      | rs3012491  | 10 | 17065672  | C,T | 0.9037 | 0.9943 | 0.232  | 0.045 | 3.16E-07 |
| pg-n      | rs3012493  | 10 | 17065834  | C,T | 0.0962 | 0.9912 | -0.232 | 0.045 | 3.19E-07 |
| pg-n      | rs1801229  | 10 | 17064621  | A,T | 0.0964 | 0.9971 | -0.231 | 0.045 | 3.19E-07 |
| pg-n      | rs1801231  | 10 | 17064509  | A,G | 0.9036 | 0.997  | 0.231  | 0.045 | 3.25E-07 |
| pg-n      | rs3012484  | 10 | 17064410  | C,T | 0.0963 | 0.9954 | -0.231 | 0.045 | 3.51E-07 |
| pg-n      | rs2932895  | 10 | 17064381  | A,T | 0.0962 | 0.9952 | -0.231 | 0.045 | 3.55E-07 |
| pg-n      | rs2942365  | 10 | 17064223  | A,C | 0.0962 | 0.9946 | -0.23  | 0.045 | 3.68E-07 |
| pg-n      | rs2942364  | 10 | 17064031  | C,T | 0.9039 | 0.9943 | 0.23   | 0.045 | 3.76E-07 |
| pg-n      | rs1512702  | 10 | 17063674  | G,T | 0.9039 | 0.9939 | 0.23   | 0.045 | 3.85E-07 |
| pg-n      | rs3012494  | 10 | 17066390  | A,G | 0.0949 | 0.9706 | -0.233 | 0.046 | 4.02E-07 |

|        |            |    |           |     |        |        |        |       |          |
|--------|------------|----|-----------|-----|--------|--------|--------|-------|----------|
| pg-n   | rs3012482  | 10 | 17063663  | C,T | 0.096  | 0.9932 | -0.23  | 0.045 | 4.05E-07 |
| pg-n   | rs3012480  | 10 | 17063570  | C,T | 0.9041 | 0.9926 | 0.23   | 0.045 | 4.25E-07 |
| pg-chL | rs463498   | 21 | 43150483  | C,T | 0.9347 | 0.9819 | 0.326  | 0.061 | 7.55E-08 |
| pg-chL | rs4148974  | 21 | 43196789  | C,T | 0.9472 | 0.9768 | 0.365  | 0.068 | 7.65E-08 |
| pg-chL | rs460128   | 21 | 43147076  | A,T | 0.0645 | 0.9837 | -0.324 | 0.061 | 1.08E-07 |
| pg-chL | rs2839603  | 21 | 43197575  | C,T | 0.0674 | 0.9723 | -0.312 | 0.06  | 2.05E-07 |
| pg-chL | rs11203166 | 21 | 43216705  | A,G | 0.9322 | 0.9523 | 0.314  | 0.06  | 2.12E-07 |
| pg-chL | rs2321769  | 6  | 79494679  | G,T | 0.548  | 0.999  | -0.154 | 0.031 | 4.27E-07 |
| pg-chL | rs9350774  | 6  | 79518322  | A,G | 0.5481 | 1      | -0.154 | 0.031 | 4.27E-07 |
| pg-chL | rs9350776  | 6  | 79520564  | A,G | 0.5481 | 1      | -0.154 | 0.031 | 4.27E-07 |
| pg-chL | rs1180825  | 6  | 79490569  | G,T | 0.548  | 0.9987 | -0.154 | 0.031 | 4.28E-07 |
| pg-chL | rs3918524  | 6  | 79515816  | A,G | 0.4519 | 0.9999 | 0.154  | 0.031 | 4.28E-07 |
| pg-chL | rs7740607  | 6  | 79498009  | C,T | 0.548  | 0.9991 | -0.154 | 0.031 | 4.28E-07 |
| pg-chL | rs9352628  | 6  | 79514166  | G,T | 0.4519 | 0.9998 | 0.154  | 0.031 | 4.28E-07 |
| pg-chL | rs9359343  | 6  | 79513450  | A,G | 0.4519 | 0.9997 | 0.154  | 0.031 | 4.28E-07 |
| pg-chL | rs7743640  | 6  | 79510794  | A,G | 0.5481 | 0.9996 | -0.154 | 0.031 | 4.29E-07 |
| pg-chL | rs9352627  | 6  | 79512305  | C,T | 0.4519 | 0.9997 | 0.154  | 0.031 | 4.29E-07 |
| pg-chL | rs9448542  | 6  | 79501084  | A,C | 0.4519 | 0.9995 | 0.154  | 0.031 | 4.29E-07 |
| pg-chL | rs2321772  | 6  | 79532909  | G,T | 0.452  | 0.9994 | 0.154  | 0.031 | 4.31E-07 |
| pg-chR | rs9350774  | 6  | 79518322  | A,G | 0.5481 | 1      | -0.156 | 0.03  | 2.42E-07 |
| pg-chR | rs9350776  | 6  | 79520564  | A,G | 0.5481 | 1      | -0.156 | 0.03  | 2.42E-07 |
| pg-chR | rs3918524  | 6  | 79515816  | A,G | 0.4519 | 0.9999 | 0.156  | 0.03  | 2.43E-07 |
| pg-chR | rs2321769  | 6  | 79494679  | G,T | 0.548  | 0.999  | -0.156 | 0.03  | 2.43E-07 |
| pg-chR | rs9352628  | 6  | 79514166  | G,T | 0.4519 | 0.9998 | 0.156  | 0.03  | 2.43E-07 |
| pg-chR | rs1180825  | 6  | 79490569  | G,T | 0.548  | 0.9987 | -0.156 | 0.03  | 2.43E-07 |
| pg-chR | rs7740607  | 6  | 79498009  | C,T | 0.548  | 0.9991 | -0.156 | 0.03  | 2.43E-07 |
| pg-chR | rs9359343  | 6  | 79513450  | A,G | 0.4519 | 0.9997 | 0.156  | 0.03  | 2.44E-07 |
| pg-chR | rs9448542  | 6  | 79501084  | A,C | 0.4519 | 0.9995 | 0.156  | 0.03  | 2.44E-07 |
| pg-chR | rs7743640  | 6  | 79510794  | A,G | 0.5481 | 0.9996 | -0.156 | 0.03  | 2.44E-07 |
| pg-chR | rs9352627  | 6  | 79512305  | C,T | 0.4519 | 0.9997 | 0.156  | 0.03  | 2.44E-07 |
| pg-chR | rs2321772  | 6  | 79532909  | G,T | 0.452  | 0.9994 | 0.156  | 0.03  | 2.45E-07 |
| PC6    | rs507798   | 5  | 84846956  | C,G | 0.3687 | 0.9334 | -0.157 | 0.031 | 4.8E-07  |
| PC6    | rs612777   | 5  | 84847479  | A,G | 0.6313 | 0.9335 | 0.157  | 0.031 | 4.8E-07  |
| PC6    | rs413927   | 5  | 84848924  | C,T | 0.3687 | 0.9335 | -0.157 | 0.031 | 4.8E-07  |
| PC6    | rs488160   | 5  | 84849976  | A,G | 0.3688 | 0.9335 | -0.157 | 0.031 | 4.8E-07  |
| PC6    | rs800837   | 5  | 84853165  | A,G | 0.6312 | 0.9336 | 0.157  | 0.031 | 4.8E-07  |
| PC6    | rs1697833  | 5  | 84853946  | G,T | 0.6312 | 0.9337 | 0.157  | 0.031 | 4.9E-07  |
| PC6    | rs405852   | 5  | 84854071  | C,T | 0.6311 | 0.9338 | 0.157  | 0.031 | 4.9E-07  |
| PC6    | rs373272   | 5  | 84854412  | A,G | 0.3689 | 0.9338 | -0.157 | 0.031 | 4.9E-07  |
| PC6    | rs395495   | 5  | 84856749  | C,T | 0.3689 | 0.9338 | -0.157 | 0.031 | 4.9E-07  |
| PC6    | rs576581   | 5  | 84858101  | A,G | 0.6311 | 0.9339 | 0.157  | 0.031 | 4.9E-07  |
| PC6    | rs596598   | 5  | 84858153  | C,G | 0.631  | 0.934  | 0.157  | 0.031 | 4.9E-07  |
| PC6    | rs425542   | 5  | 84858536  | A,T | 0.369  | 0.934  | -0.157 | 0.031 | 5.0E-07  |
| PC6    | rs414692   | 5  | 84858565  | C,T | 0.631  | 0.9341 | 0.157  | 0.031 | 5.0E-07  |
| PC7    | rs4780055  | 15 | 30955652  | C,T | 0.7365 | 0.9747 | 0.17   | 0.034 | 4.0E-07  |
| PC7    | rs4780056  | 15 | 30956048  | C,G | 0.2635 | 0.9745 | -0.17  | 0.034 | 4.0E-07  |
| PC7    | rs8026174  | 15 | 30956497  | A,G | 0.2635 | 0.9744 | -0.17  | 0.034 | 4.0E-07  |
| PC7    | rs8030979  | 15 | 91794785  | C,T | 0.7328 | 0.8568 | 0.183  | 0.036 | 4.6E-07  |
| PC10   | rs11122837 | 2  | 121428330 | A,G | 0.9766 | 0.3007 | 1.019  | 0.191 | 9.6E-08  |
| PC10   | rs11689760 | 2  | 121428730 | A,C | 0.0234 | 0.3004 | -1.019 | 0.191 | 9.6E-08  |
| PC10   | rs2084234  | 2  | 121427325 | G,T | 0.9766 | 0.3007 | 1.018  | 0.191 | 9.7E-08  |
| PC10   | rs12711536 | 2  | 121426256 | C,T | 0.0234 | 0.3016 | -1.016 | 0.191 | 9.7E-08  |
| PC10   | rs10864866 | 2  | 121425133 | A,G | 0.0234 | 0.3041 | -1.011 | 0.19  | 9.9E-08  |
| PC10   | rs11681136 | 2  | 121425561 | A,G | 0.9766 | 0.3041 | 1.011  | 0.19  | 9.9E-08  |
| PC10   | rs12711535 | 2  | 121426006 | C,T | 0.0234 | 0.3034 | -1.012 | 0.19  | 1.0E-07  |
| PC10   | rs11122835 | 2  | 121424629 | G,T | 0.9766 | 0.3061 | 1.006  | 0.189 | 1.0E-07  |
| PC10   | rs1466042  | 2  | 121419389 | A,G | 0.0234 | 0.3064 | -1.005 | 0.189 | 1.0E-07  |
| PC10   | rs4848658  | 2  | 121423860 | C,T | 0.0234 | 0.3061 | -1.006 | 0.189 | 1.0E-07  |
| PC10   | rs2166565  | 2  | 121408947 | A,G | 0.0235 | 0.3105 | -0.995 | 0.188 | 1.1E-07  |
| PC10   | rs7816288  | 8  | 53271417  | C,T | 0.9891 | 0.4249 | 1.333  | 0.257 | 2.1E-07  |
| PC10   | rs10206938 | 2  | 121391708 | A,G | 0.9762 | 0.3488 | 0.912  | 0.176 | 2.2E-07  |
| PC10   | rs935428   | 2  | 121390883 | A,G | 0.9762 | 0.3491 | 0.91   | 0.176 | 2.3E-07  |
| PC11   | rs970797   | 2  | 176820065 | G,T | 0.5783 | 0.9996 | -0.159 | 0.029 | 7.6E-08  |

**Table S4. rs7559271 results for the 14 principal components.**

| PC | Beta   | SE    | p-value |
|----|--------|-------|---------|
| 1  | -0.007 | 0.026 | 0.784   |
| 2  | 0.024  | 0.030 | 0.434   |
| 3  | 0.048  | 0.028 | 0.087   |
| 4  | 0.004  | 0.029 | 0.900   |
| 5  | 0.095  | 0.025 | 2E-4    |
| 6  | 0.012  | 0.029 | 0.689   |
| 7  | -0.011 | 0.030 | 0.717   |
| 8  | 0.000  | 0.031 | 0.997   |
| 9  | -0.008 | 0.031 | 0.788   |
| 10 | 0.027  | 0.032 | 0.403   |
| 11 | 0.130  | 0.029 | 6E-6    |
| 12 | 0.015  | 0.031 | 0.624   |
| 13 | 0.009  | 0.030 | 0.764   |
| 14 | 0.001  | 0.030 | 0.974   |

Betas are shown according to the G allele
